# Supplementary material for: Participation of CCL1 in Snail-Positive Fibroblasts in Colorectal Cancer Contribute to 5-Fluorouracil/Paclitaxel Chemoresistance
Source: PubMed Central journal article supplement — Cancer Res Treat. 2017 Sep 18;50(3):894–907. doi: 10.4143/crt.2017.356 (PMC6056976; doi:10.4143/crt.2017.356), 2017-09-18
Supplement: crt-2017-356-suppl1.pdf [file crt-2017-356-suppl1.pdf]

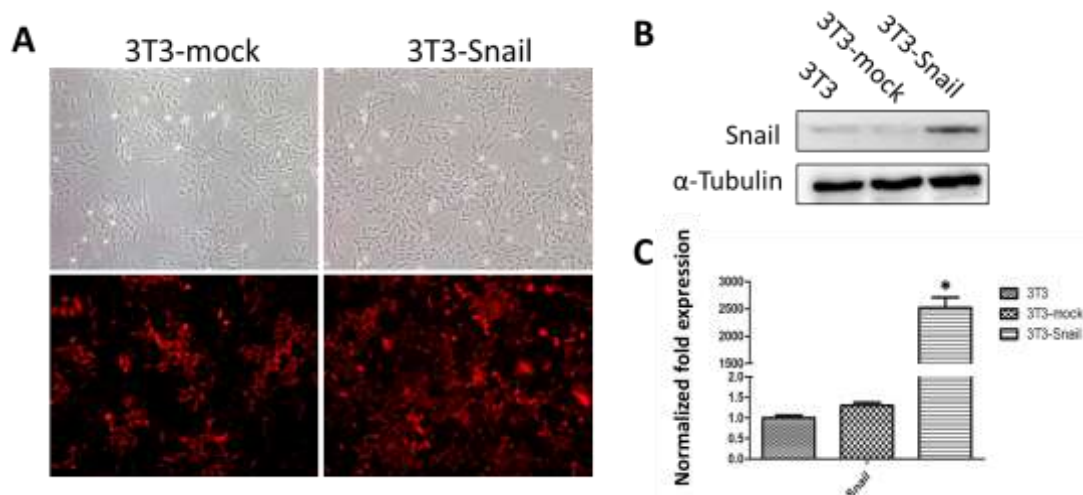

**S1 Fig.** Generation of stable over-expression of Snail 3T3 cell line (3T3-Snail). (A) White light and immunofluorescence images of the Snail or mock transduced 3T3 cells. (B) Snail expression in 3T3, 3T3-mock and 3T3-Snail stable cell lines were measured from total cell extracts by Western blot analysis. (C) The expression of Snail was detected by reverse transcription-quantitative polymerase chain reaction. Compared with control 3T3 and 3T3-mock cells, Snail expression levels were markedly upregulated in 3T3-Snail stable cell lines no matter in protein level or RNA level.
